# Supplementary material
Source: Springer Nature journal article supplement (https://www.springermedizin.de/resource/supplementary/12889_2002_41_MOESM2_ESM.pdf/9500166)

# Varna stroke incidence study locations

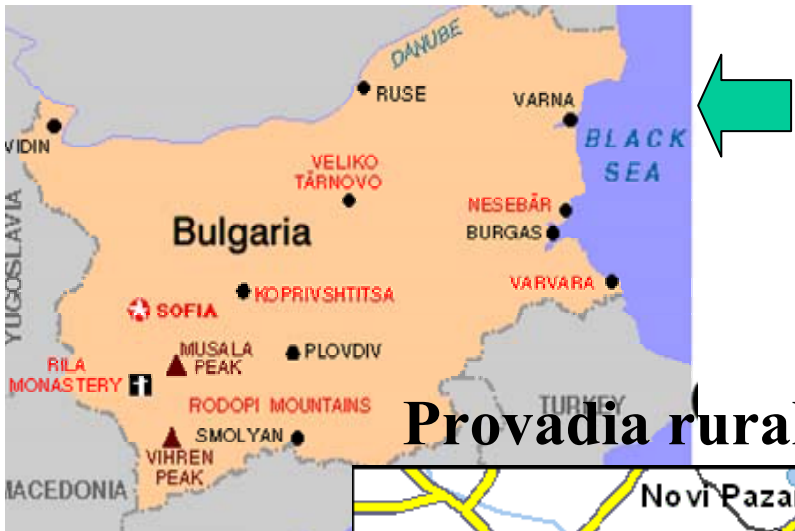

**Provadia rural district**

**Primorski district of city**

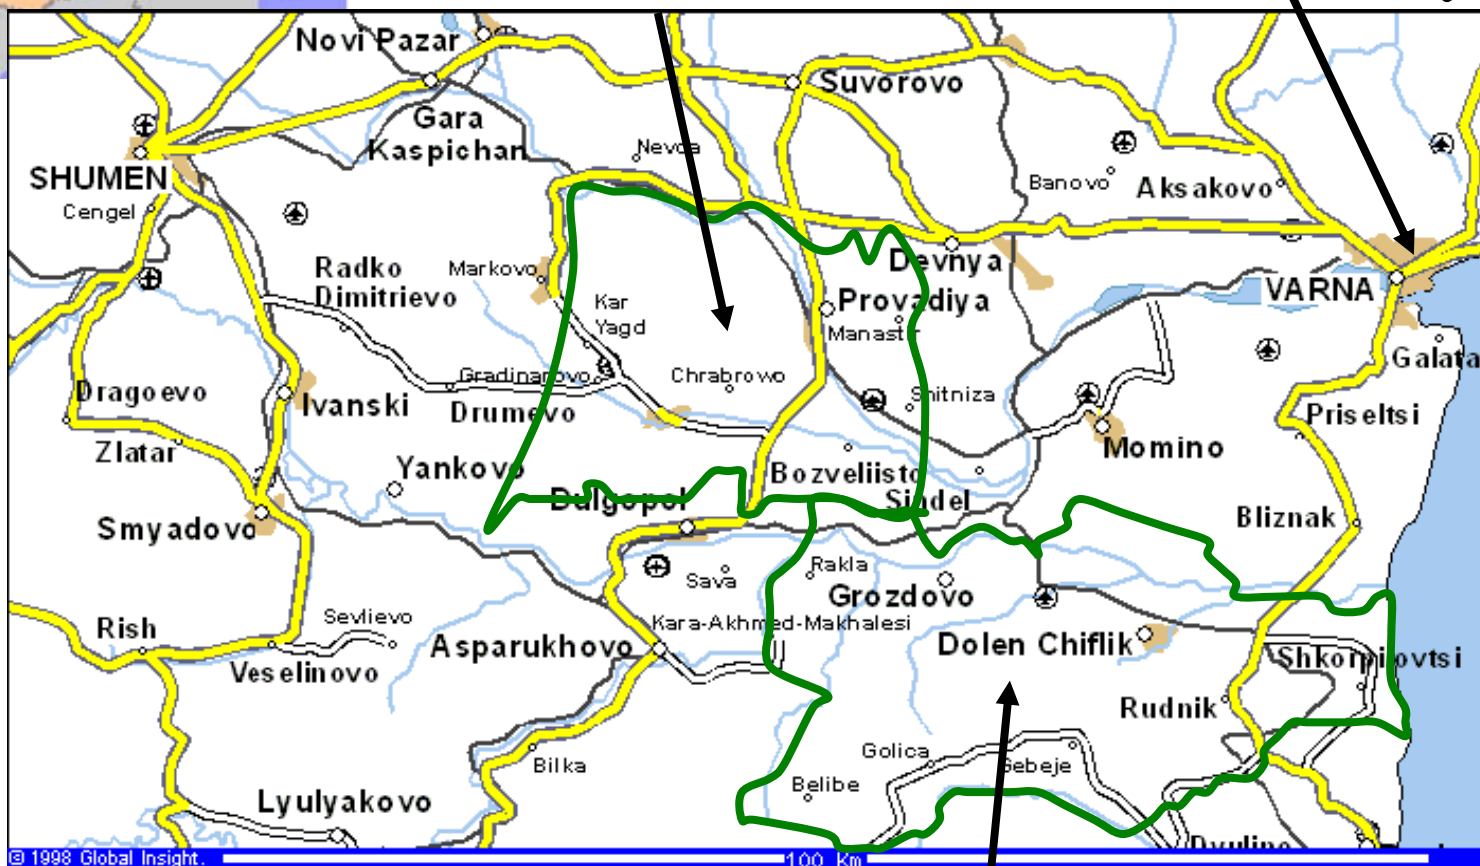

**Dolen Chiflik rural district**

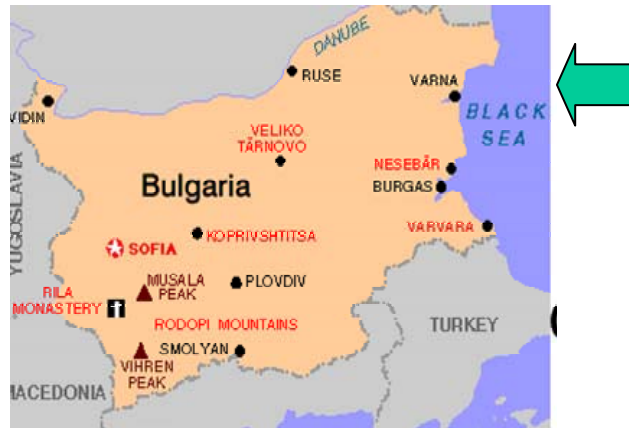

Supplement: MOESM2 [file 9500166]
